# Supplementary material for: Factors associated with Salmonella enterica and Escherichia coli during downtime in commercial broiler chicken barns in Ontario
Source: PubMed Central journal article supplement — Poult Sci. 2021 Feb 20;100(5):101065. doi: 10.1016/j.psj.2021.101065 (PMC8008170; doi:10.1016/j.psj.2021.101065), 2021-02-20
Supplement: mmc1.pdf [file mmc1.pdf]

**Supplementary File 1. Statistically significant ( $P$ -value  $\leq 0.05$ ) contrasts for the sanitation procedure and flooring type interaction from the logistic regression model in Table 3 of variables associated with the presence of *S. enterica* in samples collected from the floor(s) of commercial broiler chicken barns in Ontario during the rest period (n = 696 samples from 36 barns; random effects for barn, visit, and floor)**

| <b>Sanitation procedure<sup>a</sup> * Flooring type</b> | <b>OR</b> | <b>95% CI</b> | <b><i>P</i>-value</b> |
|---------------------------------------------------------|-----------|---------------|-----------------------|
| Disinfection * Wood vs. Dry * Wood                      | 21.34     | 1.12 - 405.58 | 0.042                 |
| Wet * Concrete vs. Wet * Wood                           | 0.05      | 0.005 - 0.40  | 0.005                 |

<sup>a</sup>Dry cleaning: dry cleaning only; Wet cleaning: dry cleaning followed by wet cleaning; Disinfection: dry cleaning followed by wet cleaning followed by disinfection
