# Supplementary material for: Factors associated with Salmonella enterica and Escherichia coli during downtime in commercial broiler chicken barns in Ontario
Source: PubMed Central journal article supplement — Poult Sci. 2021 Feb 20;100(5):101065. doi: 10.1016/j.psj.2021.101065 (PMC8008170; doi:10.1016/j.psj.2021.101065), 2021-02-20
Supplement: mmc2.pdf [file mmc2.pdf]

**Supplementary File 2. Statistically significant ( $P$ -value  $\leq 0.05$ ) contrasts for the sanitation procedure and sampling point interaction from the linear regression model in Table 6 of variables associated with the concentration of *E. coli* (natural log cfu/g) in samples collected from the floor(s) of commercial broiler chicken barns in Ontario during the rest period (n = 696 samples from 36 barns; random effects for barn, visit, and floor)**

| Sanitation procedure <sup>a</sup> * Sampling point               | Coefficient | 95% CI        | P-value |
|------------------------------------------------------------------|-------------|---------------|---------|
| Disinfection * baseline vs. Dry * 2-d post-sanitation            | 2.80        | 1.73 - 3.88   | < 0.001 |
| Disinfection * 2-d post-sanitation vs. Dry * 2-d post-sanitation | -1.95       | -3.03 - -0.88 | < 0.001 |
| Disinfection * 6-d post-sanitation vs. Dry * 2-d post-sanitation | -2.50       | -3.58 - -1.43 | < 0.001 |
| Disinfection * baseline vs. Dry * 6-d post-sanitation            | 2.64        | 1.57 - 3.71   | < 0.001 |
| Disinfection * 2-d post-sanitation vs. Dry * 6-d post-sanitation | -2.11       | -3.19 - -1.04 | < 0.001 |
| Disinfection * 6-d post-sanitation vs. Dry * 6-d post-sanitation | -2.66       | -3.74 - -1.59 | < 0.001 |
| Wet * 6-d post-sanitation vs. Wet * baseline                     | -2.33       | -4.31 - -0.35 | 0.021   |
| Disinfection * 2-d post-sanitation vs. Wet * baseline            | -3.35       | -5.26 - -1.44 | 0.001   |
| Disinfection * 6-d post-sanitation vs. Wet * baseline            | -3.90       | -5.81 - -1.99 | < 0.001 |
| Disinfection * baseline vs. Wet * 2-d post-sanitation            | 3.18        | 1.27 - 5.09   | 0.001   |
| Disinfection * 6-d post-sanitation vs. Wet * 2-d post-sanitation | -2.12       | -4.03 - -0.22 | 0.029   |
| Disinfection * baseline vs. Wet * 6-d post-sanitation            | 3.74        | 1.83 - 5.65   | < 0.001 |
| Disinfection * 2-d post-sanitation vs. Disinfection * baseline   | -4.75       | -5.54 - -3.97 | < 0.001 |
| Disinfection * 6-d post-sanitation vs. Disinfection * baseline   | -5.30       | -6.08 - -4.52 | < 0.001 |

<sup>a</sup>Dry cleaning: dry cleaning only; Wet cleaning: dry cleaning followed by wet cleaning; Disinfection: dry cleaning followed by wet cleaning followed by disinfection
